# Supplementary material for: Epidemiological variations and trends in glaucoma burden in the Belt and Road countries
Source: BMC Ophthalmol. 2024 Apr 25;24:195. doi: 10.1186/s12886-024-03464-z (PMC11046886; doi:10.1186/s12886-024-03464-z)
Supplement: Supplementary file 4 — Supplementary Material 4. [file 12886_2024_3464_MOESM4_ESM.xlsx]

## Sheet: Sheet1
	Male			Female
Countries	AAPC 95%CI	P value		AAPC 95%CI	P value
Global	-1.14(-1.18,-1.10)	<0.001		-0.91(-0.96,-0.86)	<0.001
SDI Regions
Low SDI	-0.81(-0.89,-0.73)	<0.001		-1.05(-1.11,-0.99)	<0.001
Low-middle SDI	-1.52(-1.62,-1.43)	<0.001		-1.57(-1.65,-1.49)	<0.001
Middle SDI	-1.43(-1.49,-1.36)	<0.001		-1.28(-1.35,-1.22)	<0.001
High-middle SDI	-1.26(-1.35,-1.18)	<0.001		-1.06(-1.13,-0.98)	<0.001
High SDI	-0.58(-0.66,-0.50)	<0.001		-0.75(-0.85,-0.65)	<0.001
East Asia
China	-1.46(-1.82,-1.10)	<0.001		-0.95(-1.29,-0.61)	<0.001
Central Asia
Armenia	-1.50(-1.55,-1.45)	<0.001		-1.38(-1.43,-1.33)	<0.001
Azerbaijan	-1.37(-1.51,-1.22)	<0.001		-1.22(-1.35,-1.09)	<0.001
Georgia	-0.64(-0.69,-0.59)	<0.001		-0.56(-0.60,-0.52)	<0.001
Kazakhstan	-1.48(-1.62,-1.34)	<0.001		-1.31(-1.44,-1.18)	<0.001
Kyrgyzstan	-0.84(-0.92,-0.75)	<0.001		-0.68(-0.75,-0.60)	<0.001
Mongolia	-1.74(-1.83,-1.65)	<0.001		-1.30(-1.40,-1.20)	<0.001
Tajikistan	-0.91(-0.99,-0.84)	<0.001		-0.81(-0.87,-0.74)	<0.001
Turkmenistan	-1.38(-1.44,-1.33)	<0.001		-1.28(-1.33,-1.22)	<0.001
Uzbekistan	-1.27(-1.33,-1.21)	<0.001		-1.12(-1.18,-1.06)	<0.001
South Asia
Bangladesh	-1.77(-1.85,-1.68)	<0.001		-1.86(-1.91,-1.81)	<0.001
Bhutan	-2.76(-3.03,-2.49)	<0.001		-2.42(-2.69,-2.15)	<0.001
India	-1.60(-1.74,-1.45)	<0.001		-1.80(-1.94,-1.67)	<0.001
Nepal	-1.79(-1.96,-1.61)	<0.001		-1.43(-1.51,-1.35)	<0.001
Pakistan	0.35(0.19,0.50)	<0.001		-0.29(-0.39,-0.20)	<0.001
Southeast Asia
Cambodia	-1.67(-1.83,-1.51)	<0.001		-1.29(-1.45,-1.14)	<0.001
Indonesia	-1.02(-1.12,-0.92)	<0.001		-0.86(-0.91,-0.81)	<0.001
Lao	-1.00(-1.13,-0.87)	<0.001		-0.76(-0.92,-0.60)	<0.001
Malaysia	-0.17(-0.45,0.11)	0.221778		-0.63(-0.80,-0.45)	<0.001
Maldives	-2.28(-2.45,-2.11)	<0.001		-2.16(-2.28,-2.03)	<0.001
Burma	-1.34(-1.67,-1.01)	<0.001		-1.37(-1.81,-0.94)	<0.001
Philippines	-0.59(-0.64,-0.54)	<0.001		-0.59(-0.64,-0.53)	<0.001
Sri Lanka	-1.36(-1.48,-1.25)	<0.001		-1.38(-1.47,-1.28)	<0.001
Thailand	-2.67(-2.90,-2.44)	<0.001		-1.87(-2.03,-1.71)	<0.001
Viet Nam	-1.83(-1.90,-1.76)	<0.001		-2.06(-2.24,-1.89)	<0.001
High-income Asia pacific
Brunei Darussalam	-0.52(-0.55,-0.49)	<0.001		-0.51(-0.63,-0.40)	<0.001
Singapore	-0.83(-0.88,-0.77)	<0.001		-0.73(-0.78,-0.68)	<0.001
North Africa and Middle East
Afghanistan	-0.16(-0.29,-0.03)	0.015729		0.33(0.18,0.49)	<0.001
Bahrain	-2.05(-2.14,-1.96)	<0.001		-1.92(-2.01,-1.84)	<0.001
Egypt	-1.65(-1.69,-1.60)	<0.001		-1.47(-1.52,-1.42)	<0.001
Iran	-2.00(-2.14,-1.86)	<0.001		-2.20(-2.39,-2.00)	<0.001
Iraq	-1.81(-1.91,-1.70)	<0.001		-1.66(-1.76,-1.56)	<0.001
Jordan	-2.43(-2.55,-2.32)	<0.001		-2.13(-2.20,-2.07)	<0.001
Kuwait	-1.61(-1.65,-1.56)	<0.001		-1.48(-1.53,-1.44)	<0.001
Lebanon	-1.58(-1.69,-1.47)	<0.001		-1.45(-1.57,-1.33)	<0.001
Oman	-1.18(-1.21,-1.16)	<0.001		-0.80(-0.89,-0.71)	<0.001
Palestine	-2.10(-2.32,-1.88)	<0.001		-1.87(-2.05,-1.68)	<0.001
Qatar	-1.67(-1.87,-1.48)	<0.001		-1.02(-1.34,-0.70)	<0.001
Saudi Arabia	-0.75(-1.14,-0.35)	0.000635		-1.12(-1.37,-0.86)	<0.001
Syrian Arab Republic	-1.93(-2.04,-1.82)	<0.001		-1.78(-1.90,-1.67)	<0.001
Turkey	-2.23(-2.35,-2.12)	<0.001		-1.95(-2.09,-1.81)	<0.001
United Arab Emirates	-1.61(-1.72,-1.50)	<0.001		-1.52(-1.63,-1.40)	<0.001
Yemen	-1.40(-1.48,-1.33)	<0.001		-1.03(-1.12,-0.94)	<0.001
Central Europe
Albania	-1.32(-1.37,-1.27)	<0.001		-1.40(-1.44,-1.36)	<0.001
Bosnia and Herzegovina	-1.56(-1.71,-1.40)	<0.001		-1.73(-1.88,-1.58)	<0.001
Bulgaria	-0.46(-0.58,-0.34)	<0.001		-0.40(-0.53,-0.27)	<0.001
Croatia	-0.96(-1.00,-0.92)	<0.001		-1.00(-1.03,-0.96)	<0.001
Czechia	-0.95(-1.03,-0.87)	<0.001		-0.94(-1.02,-0.86)	<0.001
Hungary	-1.29(-1.38,-1.21)	<0.001		-1.36(-1.45,-1.27)	<0.001
Montenegro	-0.79(-0.90,-0.68)	<0.001		-0.83(-0.94,-0.73)	<0.001
Macedonia	-1.16(-1.21,-1.11)	<0.001		-1.28(-1.34,-1.22)	<0.001
Poland	-0.92(-1.00,-0.84)	<0.001		-0.93(-1.00,-0.86)	<0.001
Romania	-1.12(-1.16,-1.09)	<0.001		-1.15(-1.17,-1.13)	<0.001
Serbia	-1.22(-1.28,-1.16)	<0.001		-1.27(-1.32,-1.21)	<0.001
Slovakia	-1.00(-1.04,-0.96)	<0.001		-1.02(-1.05,-0.98)	<0.001
Slovenia	-1.03(-1.09,-0.97)	<0.001		-1.04(-1.10,-0.98)	<0.001
Eastern Europe
Belarus	-1.25(-1.33,-1.17)	<0.001		-1.25(-1.34,-1.15)	<0.001
Estonia	-1.21(-1.28,-1.13)	<0.001		-1.41(-1.49,-1.33)	<0.001
Latvia	-1.13(-1.19,-1.08)	<0.001		-1.17(-1.22,-1.11)	<0.001
Lithuania	-1.00(-1.04,-0.95)	<0.001		-1.05(-1.08,-1.01)	<0.001
Moldova	-1.15(-1.23,-1.08)	<0.001		-1.15(-1.24,-1.07)	<0.001
Russian Federation	-1.32(-1.45,-1.19)	<0.001		-1.44(-1.56,-1.32)	<0.001
Ukraine	-0.81(-0.89,-0.73)	<0.001		-0.83(-0.91,-0.75)	<0.001
Western Europe
Cyprus	-1.36(-1.46,-1.25)	<0.001		-1.33(-1.45,-1.21)	<0.001
Greece	-0.92(-1.02,-0.83)	<0.001		-0.93(-1.03,-0.83)	<0.001
Israel	-1.02(-1.12,-0.92)	<0.001		-1.07(-1.17,-0.96)	<0.001
