# Supplementary material for: Epidemiological variations and trends in glaucoma burden in the Belt and Road countries
Source: BMC Ophthalmol. 2024 Apr 25;24:195. doi: 10.1186/s12886-024-03464-z (PMC11046886; doi:10.1186/s12886-024-03464-z)
Supplement: Supplementary file 6 — Supplementary Material 6. [file 12886_2024_3464_MOESM6_ESM.xlsx]

## Sheet: Sheet1
	High fasting plasma glucose, 1990-2019			High fasting plasma glucose, 2010-2019
Countries	AAPC 95%CI	P value		AAPC 95%CI	P value
Global	0.21(0.14,0.28)	<0.001		-0.09(-0.19,0.02)	0.089072
SDI Regions
Low SDI	0.06(-0.05,0.17)	0.265962		-0.46(-0.64,-0.27)	<0.001
Low-middle SDI	-0.29(-0.41,-0.17)	<0.001		-0.42(-0.69,-0.15)	0.007193
Middle SDI	-0.27(-0.34,-0.21)	<0.001		-0.42(-0.52,-0.31)	<0.001
High-middle SDI	0.02(-0.16,0.21)	0.789842		-1.16(-1.42,-0.91)	<0.001
High SDI	0.76(0.58,0.94)	<0.001		1.21(1.03,1.38)	<0.001
East Asia
China	-0.81(-1.17,-0.45)	<0.001		-1.34(-2.12,-0.56)	0.004319
Central Asia
Armenia	0.32(0.11,0.52)	0.003249		-0.66(-0.75,-0.56)	<0.001
Azerbaijan	1.12(0.88,1.36)	<0.001		0.02(-0.03,0.06)	0.399095
Georgia	2.01(1.85,2.18)	<0.001		0.36(0.12,0.60)	0.008276
Kazakhstan	0.61(0.49,0.73)	<0.001		0.34(-0.16,0.85)	0.156406
Kyrgyzstan	0.55(0.43,0.66)	<0.001		-0.01(-0.12,0.10)	0.84186
Mongolia	0.23(0.12,0.34)	<0.001		-0.31(-0.40,-0.22)	<0.001
Tajikistan	1.92(1.85,1.99)	<0.001		1.19(0.98,1.40)	<0.001
Turkmenistan	0.55(0.44,0.66)	<0.001		0.13(0.08,0.18)	<0.001
Uzbekistan	2.17(2.00,2.33)	<0.001		0.44(0.28,0.60)	<0.001
South Asia
Bangladesh	-0.70(-0.92,-0.48)	<0.001		-1.89(-2.29,-1.50)	<0.001
Bhutan	-0.81(-1.10,-0.52)	<0.001		0.42(0.33,0.50)	<0.001
India	-0.57(-0.73,-0.40)	<0.001		-0.23(-0.73,0.27)	0.313041
Nepal	-0.09(-0.20,0.03)	0.122612		-0.25(-0.57,0.07)	0.110334
Pakistan	1.87(1.68,2.05)	<0.001		-0.09(-0.63,0.45)	0.716401
Southeast Asia
Cambodia	1.33(1.05,1.60)	<0.001		2.89(2.44,3.34)	<0.001
Indonesia	0.64(0.50,0.78)	<0.001		-0.51(-0.94,-0.08)	0.026742
Lao	0.73(0.56,0.90)	<0.001		-0.18(-0.24,-0.13)	<0.001
Malaysia	0.94(0.70,1.17)	<0.001		-0.71(-1.40,-0.02)	0.044896
Maldives	-1.11(-1.31,-0.92)	<0.001		-0.14(-0.32,0.04)	0.110493
Burma	0.22(-0.08,0.53)	0.148118		-2.10(-3.35,-0.84)	0.005038
Philippines	-0.35(-0.43,-0.27)	<0.001		-0.73(-1.07,-0.39)	0.00118
Sri Lanka	0.55(0.39,0.71)	<0.001		-0.53(-1.07,0.02)	0.055242
Thailand	-1.24(-1.51,-0.97)	<0.001		0.36(0.08,0.64)	0.017318
Viet Nam	-0.27(-0.38,-0.15)	<0.001		-0.08(-0.43,0.26)	0.585794
High-income Asia pacific
Brunei Darussalam	-0.20(-0.37,-0.04)	0.019318		-1.50(-1.62,-1.38)	<0.001
Singapore	-0.75(-0.89,-0.61)	<0.001		-1.52(-2.20,-0.83)	0.000958
North Africa and Middle East
Afghanistan	1.98(1.81,2.15)	<0.001		0.63(0.58,0.69)	<0.001
Bahrain	-0.53(-0.64,-0.42)	<0.001		-0.92(-1.19,-0.65)	<0.001
Egypt	1.11(0.97,1.24)	<0.001		0.53(0.24,0.81)	0.00264
Iran	0.15(-0.03,0.33)	0.097701		-0.75(-1.29,-0.20)	0.01412
Iraq	-0.42(-0.56,-0.27)	<0.001		-0.78(-0.82,-0.73)	<0.001
Jordan	-1.46(-1.64,-1.28)	<0.001		-1.18(-1.54,-0.83)	<0.001
Kuwait	-0.57(-0.77,-0.37)	<0.001		-0.95(-1.40,-0.49)	0.001396
Lebanon	0.03(-0.11,0.18)	0.616427		-1.33(-1.73,-0.94)	<0.001
Oman	0.90(0.73,1.08)	<0.001		0.57(0.44,0.70)	<0.001
Palestine	-0.13(-0.37,0.12)	0.299288		0.65(-0.48,1.79)	0.222587
Qatar	-0.10(-0.56,0.36)	0.656906		-1.69(-1.83,-1.54)	<0.001
Saudi Arabia	0.65(0.28,1.02)	0.001324		-1.15(-1.27,-1.02)	<0.001
Syrian Arab Republic	-0.52(-0.60,-0.44)	<0.001		0.11(0.07,0.15)	<0.001
Turkey	0.11(-0.21,0.42)	0.497616		-2.03(-2.42,-1.64)	<0.001
United Arab Emirates	-0.32(-0.42,-0.21)	<0.001		-1.43(-1.78,-1.07)	<0.001
Yemen	0.67(0.48,0.86)	<0.001		-0.25(-0.80,0.30)	0.326071
Central Europe
Albania	-0.18(-0.26,-0.10)	<0.001		0.33(-0.16,0.83)	0.158792
Bosnia and Herzegovina	0.59(0.46,0.71)	<0.001		0.20(-0.09,0.50)	0.143117
Bulgaria	0.61(0.36,0.85)	<0.001		-1.10(-1.23,-0.98)	<0.001
Croatia	0.02(-0.04,0.09)	0.493348		0.53(0.10,0.96)	0.021183
Czechia	0.61(0.38,0.84)	<0.001		1.80(1.63,1.97)	<0.001
Hungary	-0.17(-0.28,-0.06)	0.005027		-0.79(-1.33,-0.24)	0.010279
Montenegro	0.30(0.19,0.42)	<0.001		0.19(-0.14,0.53)	0.218269
Macedonia	0.35(0.27,0.43)	<0.001		-0.07(-0.49,0.36)	0.723436
Poland	0.18(-0.06,0.42)	0.139743		0.81(0.62,1.01)	1.1e-05
Romania	-0.02(-0.08,0.05)	0.606665		0.25(-0.12,0.63)	0.161635
Serbia	0.04(-0.04,0.13)	0.303202		0.09(-0.26,0.43)	0.579652
Slovakia	-0.31(-0.39,-0.24)	<0.001		0.34(-0.04,0.72)	0.075048
Slovenia	-0.83(-0.94,-0.72)	<0.001		-0.05(-0.61,0.50)	0.83153
Eastern Europe
Belarus	-0.83(-1.06,-0.60)	<0.001		-1.81(-2.45,-1.17)	<0.001
Estonia	-0.10(-0.29,0.09)	0.270635		-1.11(-1.59,-0.63)	0.000699
Latvia	0.59(0.43,0.75)	0		-0.61(-0.88,-0.34)	0.000902
Lithuania	-0.10(-0.24,0.04)	0.166745		-1.09(-1.64,-0.53)	0.002059
Moldova	-0.21(-0.43,0.01)	0.057156		-1.82(-2.24,-1.40)	9e-06
Russian Federation	-0.15(-0.32,0.01)	0.059822		0.05(-0.63,0.74)	0.866276
Ukraine	0.07(-0.11,0.26)	0.416151		-0.60(-1.01,-0.19)	0.010142
Western Europe
Cyprus	-1.77(-1.95,-1.58)	<0.001		-0.50(-0.75,-0.25)	0.001875
Greece	0.47(0.41,0.54)	<0.001		0.78(0.70,0.86)	<0.001
Israel	0.79(0.38,1.21)	0.000522		-3.17(-4.15,-2.19)	<0.001
